# Supplementary material for: Is grazing exclusion effective in restoring vegetation in degraded alpine grasslands in Tibet, China?
Source: PeerJ. 2015 Jun 16;3:e1020. doi: 10.7717/peerj.1020 (PMC4476103; doi:10.7717/peerj.1020)
Supplement: Supplemental Information 1 — Values of plant community characteristics and biomass in three alpine grassland types at nine sampling sites under free grazing and grazing exclusion conditions. [file peerj-03-1020-s001.xlsx]

## Sheet: Table S1
Site	Alpine grassland type	Grazing regime	Total cover (%)	Vegetation height (cm)	Simpson index	Shannon index	Pielou index	Aboveground biomass (g m-2)	Belowground biomass (g m-2)	Total biomass (g m-2)
Damxung	Alpine meadow	Free grazing	47.5222	1.98	0.760761	1.67149	0.803816	32.48	182.04	214.52
Damxung	Alpine meadow	Free grazing	57.9539	3.92	0.62554	1.3756	0.661525	62.28	490.88	553.16
Damxung	Alpine meadow	Free grazing	53.3176	1.45	0.32283	0.722603	0.371345	63.52	533.4	596.92
Nagqu	Alpine meadow	Free grazing	33.4719	1.48	0.246386	0.54329	0.337565	35.4	167.24	202.64
Nagqu	Alpine meadow	Free grazing	44.6292	1.76	0.198161	0.480979	0.26844	51.68	317.28	368.96
Nagqu	Alpine meadow	Free grazing	66.9438	1.47	0.295224	0.660882	0.410629	61.4	3224.24	3285.64
Nierong	Alpine meadow	Free grazing	86.462	1.47	0.307713	0.663911	0.370536	115.6	390.88	506.48
Nierong	Alpine meadow	Free grazing	81.9113	5.59	0.340092	0.714461	0.398748	153.56	589.2	742.76
Nierong	Alpine meadow	Free grazing	91.0126	7.25	0.567954	0.968642	0.540609	112.92	636.04	748.96
Ando	Alpine meadow	Free grazing	72.4387	1.5	0.12938	0.345172	0.177383	46.6	504.04	550.64
Ando	Alpine meadow	Free grazing	54.3291	1.76	0.31286	0.709295	0.364506	74.52	336.027	410.547
Ando	Alpine meadow	Free grazing	45.8779	1.76	0.31286	0.709295	0.364506	40.3733	168.013	208.387
Baingoin	Alpine steppe	Free grazing	22.9219	7.5	0.697368	1.36729	0.702649	64.92	296.72	361.64
Baingoin	Alpine steppe	Free grazing	19.6473	6.78	0.718892	1.35357	0.841021	20.84	279.28	300.12
Baingoin	Alpine steppe	Free grazing	18.3375	4.95	0.698163	1.4096	0.72439	53.68	362.68	416.36
Nima	Alpine steppe	Free grazing	9.76865	5.2	0.587334	1.00862	0.727566	13.4	171.68	185.08
Nima	Alpine steppe	Free grazing	14.653	5.72	0.545536	0.936306	0.675402	19.08	320.04	339.12
Nima	Alpine steppe	Free grazing	16.1183	5.42	0.58686	0.997534	0.719569	23.52	210.04	233.56
Coqen	Alpine steppe	Free grazing	11.8938	5.28	0.741542	1.44075	0.895185	52	166.88	218.88
Coqen	Alpine steppe	Free grazing	13.3805	5.49	0.698411	1.3631	0.760758	30.6	98.28	128.88
Coqen	Alpine steppe	Free grazing	10.407	3.62	0.774235	1.6444	0.845054	17.36	87.52	104.88
Ngamring	Alpine steppe	Free grazing	21.2104	5.66	0.623659	1.14465	0.711212	37.76	126.56	164.32
Ngamring	Alpine steppe	Free grazing	12.7263	5.18	0.618569	1.41663	0.644735	47.2	196.6	243.8
Ngamring	Alpine steppe	Free grazing	8.48417	3.92	0.777051	1.80254	0.866839	27.04	123.36	150.4
Gêrzê	Alpine desert steppe	Free grazing	5.48671	5.91	0.38498	0.644107	0.586291	12.12	196.08	208.2
Gêrzê	Alpine desert steppe	Free grazing	5.14379	5.21	0.536043	0.905529	0.824248	11.4	150.88	162.28
Gêrzê	Alpine desert steppe	Free grazing	9.60174	6.19	0.366679	0.579001	0.527029	27.92	308.04	335.96
Damxung	Alpine meadow	Grazing exclusion	63.4268	3.69	0.428753	0.841927	0.523119	82.04	467.08	549.12
Damxung	Alpine meadow	Grazing exclusion	58.8963	4.09	0.705159	1.36421	0.847633	49.72	436.56	486.28
Damxung	Alpine meadow	Grazing exclusion	45.3049	4.25	0.706705	1.43573	0.801299	41.52	2890.44	2931.96
Nagqu	Alpine meadow	Grazing exclusion	80.9131	8.87	0.321316	0.739377	0.412654	58.72	1449.72	1508.44
Nagqu	Alpine meadow	Grazing exclusion	77.3951	6.67	0.196249	0.422758	0.304955	88.48	2620.88	2709.36
Nagqu	Alpine meadow	Grazing exclusion	70.3592	12.28	0.697681	1.44229	0.74119	112.56	254.48	367.04
Nierong	Alpine meadow	Grazing exclusion	79.9377	2.42	0.126827	0.301682	0.168372	53	936.12	989.12
Nierong	Alpine meadow	Grazing exclusion	88.8197	10.21	0.268375	0.54464	0.338404	168.96	685.68	854.64
Nierong	Alpine meadow	Grazing exclusion	79.9377	8.33	0.118591	0.280204	0.174101	86	1456.84	1542.84
Ando	Alpine meadow	Grazing exclusion	58.3283	3.05	0.432279	0.924427	0.515933	117.92	165.28	283.2
Ando	Alpine meadow	Grazing exclusion	70.8272	1.66	0.106912	0.278019	0.172743	67.72	428.08	495.8
Ando	Alpine meadow	Grazing exclusion	66.6609	2	0.114891	0.298957	0.166851	40.76	339.16	379.92
Baingoin	Alpine steppe	Grazing exclusion	38.6346	7.76	0.638994	1.33876	0.687989	85.04	448.32	533.36
Baingoin	Alpine steppe	Grazing exclusion	44.1539	11.36	0.644728	1.3052	0.670742	59.96	439.64	499.6
Baingoin	Alpine steppe	Grazing exclusion	45.8096	15.43	0.639444	1.44025	0.655484	75.84	368.08	443.92
Nima	Alpine steppe	Grazing exclusion	26.5028	12.36	0.556288	1.04212	0.751732	29.76	170.08	199.84
Nima	Alpine steppe	Grazing exclusion	29.1531	11.35	0.649986	1.19364	0.741651	44.6	200.08	244.68
Nima	Alpine steppe	Grazing exclusion	28.7114	10.16	0.716068	1.32509	0.955852	64.44	369.76	434.2
Coqen	Alpine steppe	Grazing exclusion	16.9083	4.02	0.737818	1.47669	0.824158	49.88	236.48	286.36
Coqen	Alpine steppe	Grazing exclusion	16.9083	4.25	0.626913	1.16389	0.723168	48.2	307.08	355.28
Coqen	Alpine steppe	Grazing exclusion	11.2722	5.8	0.658664	1.08683	0.989277	58.12	277.48	335.6
Ngamring	Alpine steppe	Grazing exclusion	19.5938	4.78	0.766602	1.72588	0.829972	20.64	113.68	134.32
Ngamring	Alpine steppe	Grazing exclusion	13.0625	4.48	0.658044	1.32379	0.636607	44.2	135.44	179.64
Ngamring	Alpine steppe	Grazing exclusion	16.3282	5.82	0.622246	1.24197	0.597262	83.96	207.52	291.48
Gêrzê	Alpine desert steppe	Grazing exclusion	9.6484	6.59	0.0907029	0.191444	0.276195	26.88	295.4	322.28
Gêrzê	Alpine desert steppe	Grazing exclusion	8.16403	7.01	0.271194	0.442585	0.638515	28.24	170.08	198.32
Gêrzê	Alpine desert steppe	Grazing exclusion	8.41143	6.37	0.331968	0.514149	0.74176	38.56	232.52	271.08
